# BMPs regulate multiple aspects of growth-plate chondrogenesis through opposing actions on FGF pathways

Byeong S. Yoon<sup>1</sup>, Robert Pogue<sup>2</sup>, Dmitri A. Ovchinnikov<sup>3</sup>, Isaac Yoshii<sup>1</sup>, Yuji Mishina<sup>4</sup>, Richard R. Behringer<sup>3</sup> and Karen M. Lyons<sup>1,2,\*</sup>

Bone morphogenetic protein (BMP) signaling pathways are essential regulators of chondrogenesis. However, the roles of these pathways *in vivo* are not well understood. Limb-culture studies have provided a number of essential insights, including the demonstration that BMP pathways are required for chondrocyte proliferation and differentiation. However, limb-culture studies have yielded contradictory results; some studies indicate that BMPs exert stimulatory effects on differentiation, whereas others support inhibitory effects. Therefore, we characterized the skeletal phenotypes of mice lacking *Bmpr1a* in chondrocytes (*Bmpr1a*<sup>CKO</sup>) and *Bmpr1a*<sup>CKO</sup>;*Bmpr1b*<sup>+/-</sup> (*Bmpr1a*<sup>CKO</sup>;*1b*<sup>+/-</sup>) in order to test the roles of BMP pathways in the growth plate *in vivo*. These mice reveal requirements for BMP signaling in multiple aspects of chondrogenesis. They also demonstrate that the balance between signaling outputs from BMP and fibroblast growth factor (FGF) pathways plays a crucial role in the growth plate. These studies indicate that BMP signaling is required to promote *Ihh* expression, and to inhibit activation of STAT and ERK1/2 MAPK, key effectors of FGF signaling. BMP pathways inhibit FGF signaling, at least in part, by inhibiting the expression of FGFR1. These results provide a genetic *in vivo* demonstration that the progression of chondrocytes through the growth plate is controlled by antagonistic BMP and FGF signaling pathways.

**KEY WORDS:** Bone morphogenetic protein, Cartilage, Chondrogenesis, Fibroblast growth factor, indian hedgehog, BMP receptors, Mouse

## INTRODUCTION

Endochondral ossification is the multistep process that forms the majority of the skeletal system. This process is initiated when mesenchymal cells condense and express SOX9. This transcription factor drives the commitment and differentiation of these cells into chondrocytes, resulting, ultimately, in the formation of cartilage growth plates (Kronenberg, 2003; Olsen et al., 2000). Longitudinal growth is driven by chondrocyte proliferation and enlargement. Once growth-plate chondrocytes exit the cell cycle, they form a transient pool of *indian hedgehog* (*Ihh*)-expressing prehypertrophic chondrocytes (St-Jacques et al., 1999). As they continue to differentiate, these cells upregulate expression of collagen X and undergo hypertrophy. Ultimately, terminally differentiated hypertrophic chondrocytes express osteopontin and matrix metalloproteinase 13 (MMP13) prior to undergoing apoptosis. Hypertrophic chondrocytes produce an extracellular matrix (ECM) that provides an environment conducive to bone mineralization and blood-vessel invasion (Kronenberg, 2003; Long et al., 2001).

Several signaling pathways play vital roles in the growth plate. IHH coordinates chondrocyte proliferation and differentiation, as well as osteoblast formation in the periosteum (St-Jacques et al., 1999; Long et al., 2004; Chung et al., 2001). Parathyroid hormone-related protein (PTHrP) forms a feedback loop with IHH that regulates proliferation and the onset of hypertrophic differentiation (Karp et al., 2000; Kawashima et al., 1998; Lanske et al., 1999).

Fibroblast growth factor (FGF) signaling pathways negatively regulate proliferation and differentiation via several mechanisms, including activation of STAT and ERK1/2 MAPK (Sahni et al., 2001; Murakami et al., 2004).

Bone morphogenetic protein (BMP) signaling pathways are also crucial regulators of chondrogenesis. BMPs transduce signals through complexes of type I and type II serine/threonine kinase receptors. Upon BMP binding, type II receptors phosphorylate serine/threonine residues in type I receptors. Activated type I receptors phosphorylate, and thereby activate, receptor-regulated SMAD (R-SMAD)1, R-SMAD5 and R-SMAD8. Subsequently, these R-SMADs recruit and bind SMAD4. These SMAD complexes enter the nucleus and regulate transcription of target genes (ten Dijke et al., 2003; Massagué and Gomis, 2006). BMPs also signal by activating TGFβ-activated kinase 1 (TAK1). TAK1 activates p38 MAPK (Moustakas and Heldin, 2005; Qiao et al., 2005). Three type I receptors transduce BMP signals: BMP receptor type IA (BMPRIA, also known as ALK3), BMP receptor type IB (BMPRIIB, also known as ALK6) and activin receptor type I (ACTRI, also known as ALK2) (ten Dijke et al., 1994; Rosenzweig et al., 1995; Macías-Silva et al., 1998).

Limb-culture studies have provided important insights into the diverse roles that BMPs play in the growth plate (De Luca et al., 2001; Pathi et al., 1999; Pizette and Niswander, 2000; Minina et al., 2001). Application of exogenous BMPs promotes proliferation, whereas exposure to the BMP antagonist NOGGIN inhibits proliferation. Furthermore, these studies have shown that BMP and FGF signaling have opposing actions in the growth plate (Minina et al., 2002). However, limb-culture studies have yielded contradictory results; some studies suggest that BMPs exert stimulatory effects on differentiation, whereas others support inhibitory effects. Whether these disparities arise as a result of differences in (a) utilization of signaling pathways at the different stages of development at which the studies were performed, (b) species-specific effects, and/or (c) divergent pathways in different skeletal elements, is unknown.

<sup>1</sup>Department of Molecular, Cell and Developmental Biology, University of California, Los Angeles, CA 90095, USA. <sup>2</sup>Department of Orthopaedic Surgery, David Geffen School of Medicine at the University of California, Los Angeles, CA 90095, USA.

<sup>3</sup>Department of Molecular Genetics, University of Texas MD Anderson Cancer Center, Houston, TX 77030, USA. <sup>4</sup>Laboratory of Reproductive and Developmental Toxicology, National Institute of Environmental Health Sciences, Research Triangle Park, NC 27709, USA.

\* Author for correspondence (e-mail: klyons@mednet.ucla.edu)

Moreover, some of these studies involve application of BMPs at non-physiological levels and to all tissues, including the surrounding endothelial cells, perichondrium and osteoblasts, are exposed. The tissues surrounding cartilage affect chondrogenesis in the growth plate, raising the possibility of both direct and indirect effects (Colnot et al., 2004; Colnot et al., 2005). Moreover, these studies do not reveal the endogenous roles of different type I receptors.

A number of genetic approaches have been used to reduce BMP signaling in developing skeletal elements in the mouse. Mice lacking *Gdf5* and *Gdf6* exhibit defects in chondrogenesis and joint formation (Storm et al., 1994; Settle, Jr et al., 2003). Mice lacking *Bmpr1b* exhibit defects in chondrogenesis (Baur et al., 2000; Yi et al., 2000). However, in all of these cases, defects are restricted to a subset of skeletal elements, most probably as a result of functional redundancy (Yi et al., 2000; Settle, Jr et al., 2003). The idea that BMP signaling pathways play a much broader role than is suggested by these phenotypes has been confirmed by analysis of transgenic mice overexpressing *noggin* or *Smad6* (Tsumaki et al., 2002; Horiki et al., 2004). All cartilages in these mice are hypoplastic and deficient in hypertrophic chondrocytes, suggestive of a requirement for BMP pathways in chondrocyte maturation. Recently, we demonstrated an essential role for BMP signaling at early stages of chondrogenesis by generating chondrocyte-specific *Bmpr1a* and *Bmpr1b* null mice (Yoon et al., 2005). Chondrogenesis in these double mutants is much more severely affected than in the *noggin*-overexpressing transgenics (Tsumaki et al., 2002).

We characterized the skeletal phenotypes of mice lacking *Bmpr1a* (*Bmpr1a*<sup>CKO</sup>) and *Bmpr1a*<sup>CKO</sup>;*Bmpr1b*<sup>+/-</sup> (*Bmpr1a*<sup>CKO</sup>;*1b*<sup>+/-</sup>) in cartilage in order to address the roles of BMP pathways in the growth plate. These mice displayed generalized chondrodysplasia but, unlike *Bmpr1a*<sup>CKO</sup>;*1b*<sup>-/-</sup> mice, in which chondrogenesis is so severely disrupted that growth plates never form (Yoon et al., 2005), all skeletal elements were present, permitting an assessment of the role of BMP pathways in the growth plate. This analysis demonstrated that BMP signaling is essential for multiple aspects of growth-plate chondrogenesis, including proliferation, and the completion of hypertrophic differentiation. We demonstrated that the balance between outputs from BMP and FGF pathways plays crucial roles in multiple aspects of chondrogenesis. Furthermore, these studies indicated that BMP signaling is required to promote *Ihh* expression and to inhibit *FGFR1* expression. The increased level of FGF-receptor expression appears to have functional consequences, as activation of STAT and ERK1/2 MAPK, key effectors of FGF signaling, were elevated in *Bmpr1a*<sup>CKO</sup> and *Bmpr1a*<sup>CKO</sup>;*1b*<sup>+/-</sup> mutants. These results provide a genetic demonstration that the progression of chondrocytes through the growth plate is controlled by mutually antagonistic BMP and FGF signaling pathways.

## MATERIALS AND METHODS

### Generation of *Bmpr1a*<sup>CKO</sup> and *Bmpr1a*<sup>CKO</sup>;*Bmpr1b*<sup>+/-</sup> mice

Generation of *Bmpr1b*<sup>-/-</sup>, *Bmpr1a* floxed and *Col2-Cre* mice was described previously (Yi et al., 2000; Mishina et al., 2002; Ovchinnikov et al., 2000). To generate cartilage-specific *Bmpr1a* null mice, *Bmpr1a*<sup>fl/+</sup>; *Col2-Cre* mice were intercrossed to generate *Bmpr1a*<sup>fl/fl</sup>; *Col2-Cre* (*Bmpr1a*<sup>CKO</sup>) mice. *Bmpr1a*<sup>fl/+</sup>;*Bmpr1b*<sup>+/-</sup>; *Col2-Cre* mice were intercrossed to generate *Bmpr1a*<sup>CKO</sup>;*Bmpr1b*<sup>+/-</sup> mice.

### Skeletal preparation and histology

Skeletal preparations were performed as previously described (Ivkovic et al., 2003). Briefly, embryos were eviscerated and fixed in 95% EtOH overnight at 4°C, followed by Alcian blue staining (30 mg/100 ml in 80% EtOH) at room temperature. Samples were then stained in Alizarin red (5 mg/100 ml in 0.5% KOH) and cleared in a series of graded KOH in glycerol. For

histology, embryos were fixed in 4% paraformaldehyde, decalcified and embedded in paraffin. Sections were stained with Hematoxylin and Eosin or Alcian Blue and Nuclear Fast Red (Luna, 1992).

### Immunohistochemistry and in situ hybridization

For immunohistochemistry (IHC), sections were microwaved in citrate buffer for antigen demasking. Sections were blocked with 5% goat or donkey serum, incubated with primary antibody (BMPRIA and BMPRIB: Orbigen; collagen II: Research Diagnostics; collagen X: gift from Robin Poole; osteopontin: Developmental Studies Hybridoma Bank; MMP13: Oncogene Research Products; phospho-SMAD1, phospho-SMAD5 and phospho-SMAD8, phospho-ERK1/2 MAPK, and p27 Kip1: Cell Signaling Technology; phospho-STAT1: Zymed; STAT 5a: Lab Vision; p16, p21 and PECAM: Santa Cruz Biotechnology; FGFR1: Sigma) overnight at 4°C, and then incubated with the appropriate secondary antibody at room temperature. Color was developed with DAB or the Zymed kit chromogen, and sections were counterstained with hematoxylin. For immunofluorescence, slides were washed and incubated overnight at 4°C with Alexa-Fluor-555-conjugated rabbit secondary antibody (Invitrogen).

In situ hybridization was performed with <sup>35</sup>S-dUTP labeled RNA probes and carried out as previously described (Jamin et al., 2002).

### Cell proliferation and TUNEL labeling

IHC for proliferating cell nuclear antigen (PCNA) was performed using anti-PCNA antibody (Zymed), as described above for IHC. For TUNEL labeling, the In Situ Cell Death Detection Kit, fluorescein (Roche), was used according to the manufacturer's instructions. Cell proliferation was quantified as previously described (Yi et al., 2000).

### Transient transfections and reporter assays

A 994 bp fragment of the mouse proximal *Ihh* promoter was a kind gift from Toshihisa Komori (Yoshida et al., 2004). 2HC8-luc contains 430 bp of the mouse proximal *Ihh* promoter and was a kind gift from Akiko Hata (Seki and Hata, 2004). The *Smad1* expression construct was a kind gift from Eddy DeRobertis (Pera et al., 2003). RCS cells (Mukhopadhyay et al., 1995) were cultured in 10% FBS DMEM and transfected at 50–70% confluence using GeneJuice (Novagen), according to the manufacturer's instructions, with 0.5 µg of 994-luc or 2HC8-luc, and either *Smad1* or a *lacZ* control plasmid. Cells were serum-starved for 24 hours post-transfection and then treated with 60 ng/ml recombinant human BMP2 (R&D Systems). After an additional 24 hours, luciferase activity was measured with the Dual-Luciferase Promoter Assay System (Promega). Results were obtained in triplicate for each experiment and were normalized with Renilla luciferase. Statistical significance was assessed using a *t*-test for correlated samples.

## RESULTS

### BMPRIA and BMPRIB expression in the growth plate

The expression of BMPRIA and BMPRIB in growth plates was examined by indirect immunofluorescence on E16.5 femurs (Fig. 1). By E16.5, growth plates consisting of resting, proliferative, prehypertrophic and hypertrophic zones had formed. BMPRIA was expressed throughout the growth plate, but the highest levels were found in the postmitotic prehypertrophic and hypertrophic zones (Fig. 1A). Interestingly, chondrocytes near the junction between the resting and proliferative zones had higher BMPRIA expression levels than surrounding chondrocytes, suggesting a role in regulating the transition from the resting to the proliferative state. BMPRIB was also expressed throughout the growth plate (Fig. 1B), but the highest levels were observed near the epiphyseal surface of the resting zone, suggesting a potential role in the formation of articular cartilage. The overlapping expression of the BMPRIA and BMPRIB proteins is consistent with the overlapping functions found during early chondrogenesis (Yoon et al., 2005). However, the differences in relative expression levels in different regions raises the possibility of a more predominant role of one receptor over the other in specific aspects of chondrogenesis.



IHC for phosphorylated BMP-specific R-SMADs (pSMAD1, pSMAD5 and pSMAD8) was performed to localize active BMP signaling. Activated SMAD signaling was found throughout the growth plate, consistent with the broad distribution of BMPRIA and BMPRIB (Fig. 1C). The percentage of cells responding to BMP

signaling increased as chondrocytes progressed from the resting to the proliferative zone, suggesting a role for BMP signaling in this transition (Fig. 1D,E). Furthermore, levels of signaling increased steadily throughout the proliferative zone and peaked at the proliferative-prehypertrophic junction. Levels then appeared to decrease as cells became hypertrophic. These results indicate that proliferative and prehypertrophic chondrocytes are major targets of BMP signaling, and further suggest that canonical BMP pathways regulate the transition from proliferation to terminal differentiation.

### ***Bmpr1a*<sup>CKO</sup> and *Bmpr1a*<sup>CKO</sup>;*1b*<sup>+/-</sup> mice develop generalized chondrodysplasia**

Mice carrying *Bmpr1a* floxed alleles were crossed with *Col2-Cre* transgenic mice to inactivate BMPRIA in chondrocytes, generating *Bmpr1a*<sup>fl/fl</sup>;*Col2-Cre* (*Bmpr1a*<sup>CKO</sup>) mice.

These mice were recovered at birth in Mendelian ratios, but died shortly afterwards as a result of respiratory failure caused by skeletal defects. Mutant ribs were shorter and thinner, resulting in a flattened, bell-shaped thoracic cavity. These defects reflect the generalized chondrodysplasia that occurs in *Bmpr1a*<sup>CKO</sup> mice (Fig. 2A,B).

Mice carrying various allelic combinations of *Bmpr1a*<sup>fl</sup> and *Bmpr1b* alleles were generated in order to examine whether BMPRIA and BMPRIB exert overlapping functions. *Bmpr1a*<sup>fl/+</sup>;*Col2Cre*;*Bmpr1b*<sup>-/-</sup> mice were viable and did not differ substantially from *Bmpr1b*<sup>-/-</sup> mice, indicating that a single copy of *Bmpr1a* is sufficient to sustain endochondral ossification (data not shown). *Bmpr1b*<sup>-/-</sup> mice developed severe skeletal defects in distal phalanges and minor defects in the radius/ulna and tibia/fibula (Yi et al., 2000; Baur et al., 2000). *Bmpr1a*<sup>CKO</sup>;*1b*<sup>+/-</sup> mice exhibited a generalized chondrodysplasia of considerably greater severity than that exhibited by *Bmpr1a*<sup>CKO</sup> mice. This finding is consistent with the overlapping expression patterns of BMPRIA and BMPRIB in the growth plate. In addition to rib malformations, axial defects were apparent along the entire vertebral column (Fig. 2C,D). The supraoccipital bone was significantly narrower in *Bmpr1a*<sup>CKO</sup> mice, but was completely absent in *Bmpr1a*<sup>CKO</sup>;*1b*<sup>+/-</sup> mice. Similarly, *Bmpr1a*<sup>CKO</sup> vertebrae did not fuse and the dorsal arches were broader; this phenotype was exacerbated in *Bmpr1a*<sup>CKO</sup>;*1b*<sup>+/-</sup> mice. Skeletal defects were also apparent throughout the appendicular skeleton (Fig. 2E,F). The scapula became increasingly hypoplastic as more alleles of *Bmpr1a* and *Bmpr1b* were lost. Appendicular elements were narrower and shorter in *Bmpr1a*<sup>CKO</sup> and *Bmpr1a*<sup>CKO</sup>;*1b*<sup>+/-</sup> mice, with the femur being most severely affected. Interestingly, malformations were more severe at the distal than at the proximal ends of mutant femurs and humeri, and at the proximal rather than distal ends of the tibia and fibula. Thus, the growth plates most severely affected were those that normally experience the greatest rates of cell division and differential growth (Wilsman et al., 1996a; Wilsman et al., 1996b; Pritchett, 1992).

### ***Bmpr1a*<sup>CKO</sup> and *Bmpr1a*<sup>CKO</sup>;*Bmpr1b*<sup>+/-</sup> mice exhibit defects in the growth plate**

The above analysis reveals that, whereas chondrogenesis is essentially absent in *Bmpr1a*<sup>CKO</sup>;*1b*<sup>-/-</sup> mice (Yoon et al., 2005), a single intact copy of *Bmpr1b* (*Bmpr1a*<sup>CKO</sup>;*1b*<sup>+/-</sup>) restores endochondral development to the extent that a recognizable, albeit highly abnormal, skeleton forms. At E14.5, growth plates at the distal femurs of *Bmpr1a*<sup>CKO</sup> and *Bmpr1a*<sup>CKO</sup>;*1b*<sup>+/-</sup> mice displayed numerous histological defects (Fig. 3). Although the sizes of the resting zones were comparable in *Bmpr1a*<sup>CKO</sup> and wild-type mice, the proliferative zone was reduced in mutants (arrows in Fig. 3A,B). This reduction was intensified in *Bmpr1a*<sup>CKO</sup>;*1b*<sup>+/-</sup> mice. The severe

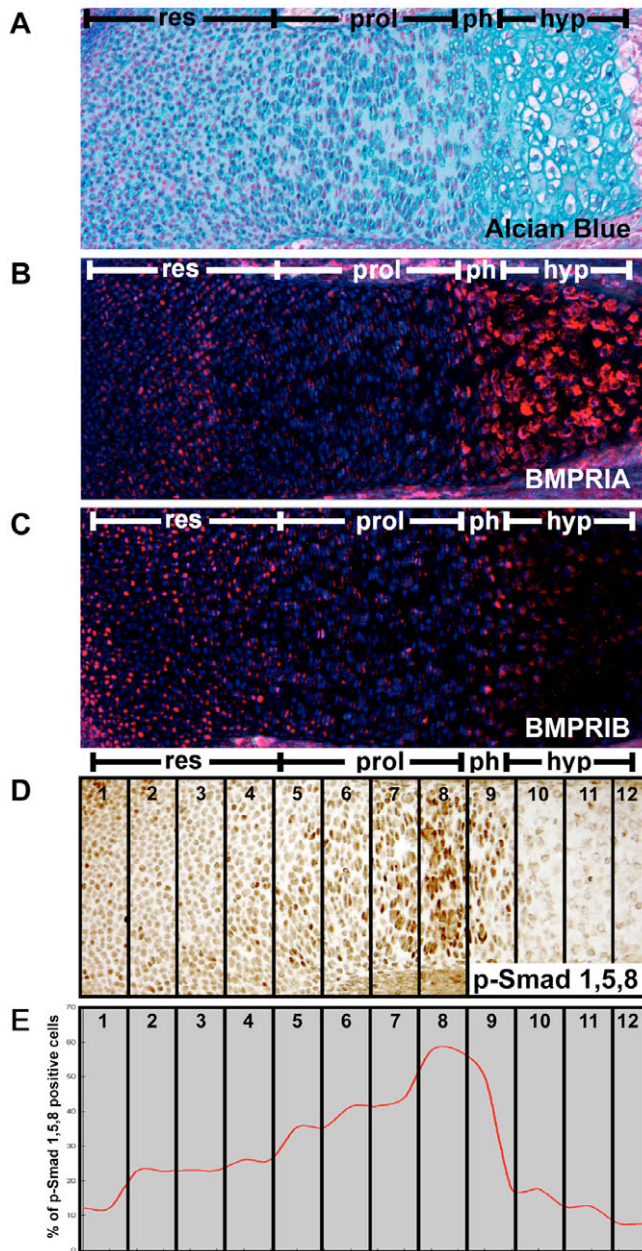

**Fig. 1. Localization of BMP receptors, and SMAD1, SMAD5 and SMAD8 activity in adjacent sections through an E16.5 proximal femur.** (A) Alcian blue staining reveals the resting (res), columnar proliferative (prol), prehypertrophic (ph), and hypertrophic (hyp) zones. (B) Indirect immunofluorescence for BMPRIA reveals highest levels in the prehypertrophic and hypertrophic zones. (C) Staining for BMPRIB indicates expression throughout the growth plate, with higher levels in resting and prehypertrophic zones. (D) IHC for pSMAD1, pSMAD5 and pSMAD8 reveals highest levels of canonical BMP signaling in lower proliferative and prehypertrophic chondrocytes. (E) Percentages of pSMAD1-, pSMAD5- and pSMAD8-positive cells were determined in the consecutive segments delineated with black lines in D.

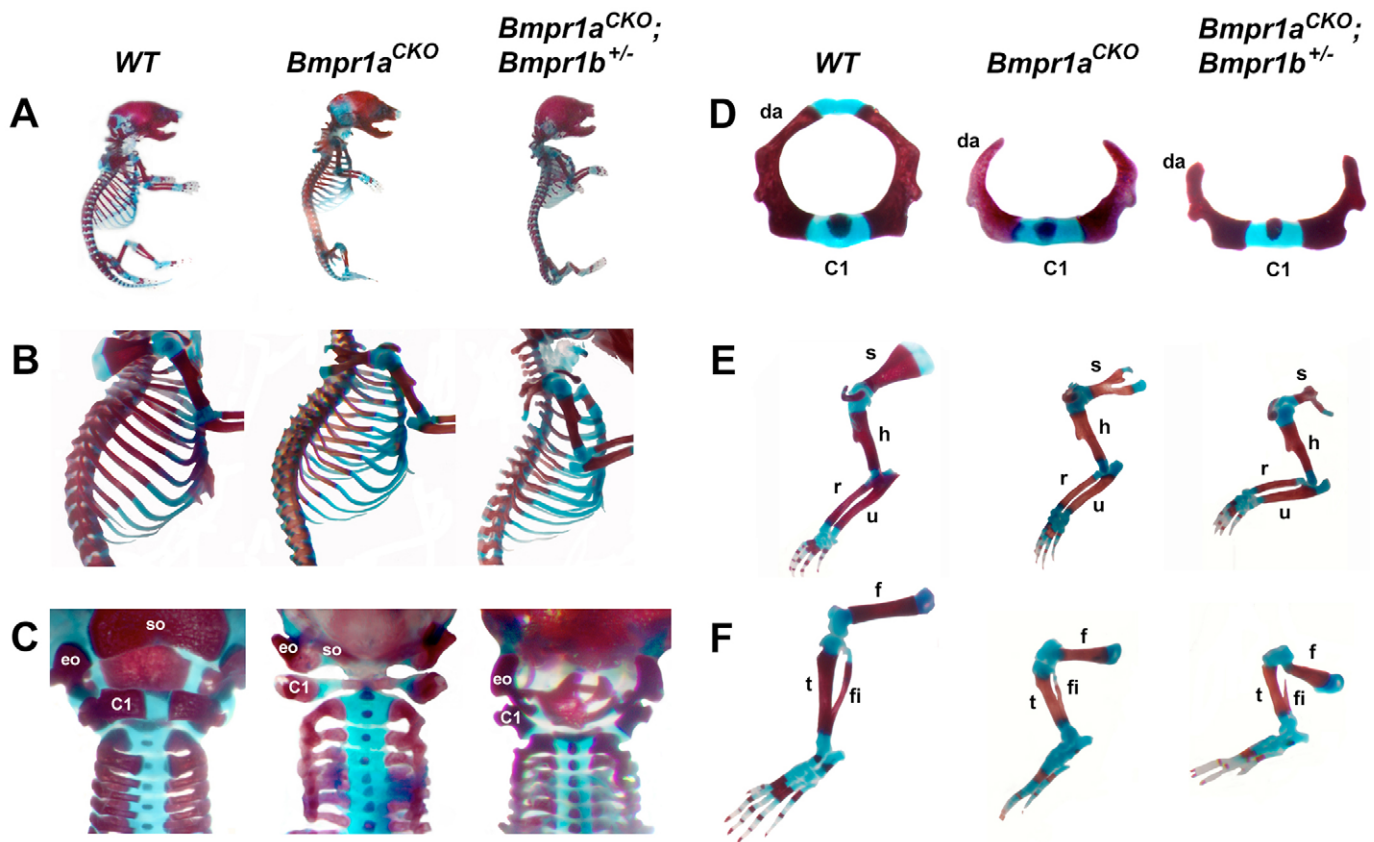

**Fig. 2. Generalized chondrodysplasia in *Bmpr1a*<sup>CKO</sup> and *Bmpr1a*<sup>CKO</sup>;*1b*<sup>+/-</sup> neonates.** (A,B) Chondrodysplasia in *Bmpr1a*<sup>CKO</sup> mice is exacerbated in *Bmpr1a*<sup>CKO</sup>;*1b*<sup>+/-</sup> mice. (C) *Bmpr1a*<sup>CKO</sup> and *Bmpr1a*<sup>CKO</sup>;*1b*<sup>+/-</sup> mice exhibit multiple axial defects. (D) The dorsal arches (da) of the vertebrae are short and fail to fuse in mutants. (E,F) Forelimb (E) and hindlimb (F) defects. All long bones are shortened in *Bmpr1a*<sup>CKO</sup> mice, and the scapula is hypoplastic. These defects are exacerbated in *Bmpr1a*<sup>CKO</sup>;*1b*<sup>+/-</sup> mice, in which the distal epiphyses of the humerus and femur are greatly reduced. f, femur; fi, fibula; h, humerus; r, radius; s, scapula; t, tibia; u, ulna; eo, exoccipital bone; so, supraoccipital bone; C1, first cervical vertebra.

constriction in the width of the femur at the junction of the resting and proliferative zones suggests that the initiation of column formation is impaired in the most severely affected growth plates of *Bmpr1a*<sup>CKO</sup>;*1b*<sup>+/-</sup> mice. Furthermore, the lengths of the chondrocyte columns were significantly reduced. These phenotypes persist throughout embryonic development, as they are also apparent at E16.5 and P0 (Fig. 3B, and data not shown). *Bmpr1a*<sup>CKO</sup> and *Bmpr1a*<sup>CKO</sup>;*1b*<sup>+/-</sup> mice also displayed defects in linear column formation. In wild-type growth plates, flattened proliferating chondrocytes intercalate with one another immediately after cell division. However, in *Bmpr1a*<sup>CKO</sup> mice, chondrocyte columns were disorganized. Proliferating chondrocytes did not intercalate properly, as many pairs of daughter cells remained juxtaposed (Fig. 3C). This phenotype became more exaggerated in *Bmpr1a*<sup>CKO</sup>;*1b*<sup>+/-</sup> mice. Very few chondrocyte columns formed in the distal femur and distal humerus, the most severely affected growth plates (Fig. 3C), and chondrocytes had a rounded morphology rather than the flattened shape observed in control littermates.

### BMP signaling regulates proliferation and apoptosis

We performed IHC for PCNA, and apoptosis assays in order to examine whether the reduced size of mutant proliferative zones is associated with reduced chondrocyte proliferation and/or survival (Fig. 4A,C). Levels of proliferation in resting zones of *Bmpr1a*<sup>CKO</sup>;*1b*<sup>+/-</sup> mice were indistinguishable from those in control

littermates. By contrast, proliferative zones of mutants had a significant reduction in the rate of proliferation (Fig. 4A,C). TUNEL labeling was performed on E16.5 distal femurs (Fig. 4B,C) in order to examine cell survival. Apoptosis was undetectable in resting and proliferative zones in control growth plates. However, in mutants, there was a significant increase in apoptosis in both the resting and proliferative compartments. The highest levels were found at the junction between the epiphyseal and columnar regions. This area narrowed and bent in mutant femurs, raising the strong possibility that increased rates of apoptosis contribute to this defect in mutants.

Progression through the cell cycle is negatively regulated by cyclin-dependent kinase inhibitors (CKIs). Several CKIs are important regulators of proliferation in chondrocytes, including p16, p21 and p27<sup>Kip1</sup> (Beier et al., 1999). In control growth plates, these CKIs were strongly expressed in the prehypertrophic and hypertrophic zones and only weakly in the proliferative zone. However, there was a significant induction of p16, p21 and p27 in the resting and proliferative zones in mutant growth plates (Fig. 4D). Thus, proliferation is inhibited in *Bmpr1a*<sup>CKO</sup> and *Bmpr1a*<sup>CKO</sup>;*1b*<sup>+/-</sup> mice, in part, because CKIs are upregulated.

### Defects in differentiation in mutant growth plates

Previous studies have shown that the onset of hypertrophic differentiation is delayed in mice lacking all alleles of *Bmpr1a* and *Bmpr1b* in cartilage (Yoon et al., 2005). By contrast, histological analysis indicated that hypertrophic chondrocytes were present in



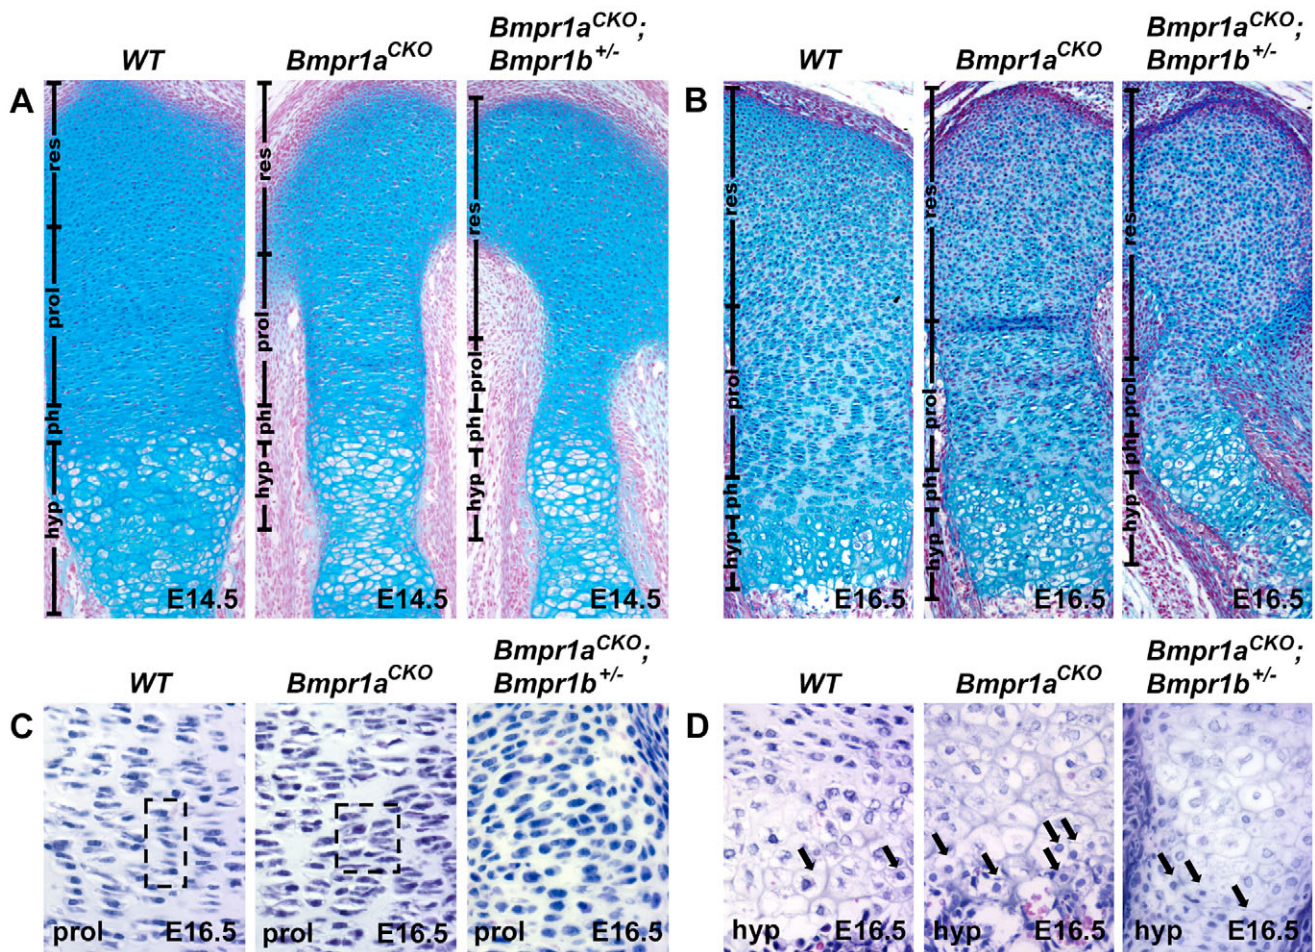

**Fig. 3. Growth-plate defects in *Bmpr1a*<sup>CKO</sup> and *Bmpr1a*<sup>CKO</sup>;*1b*<sup>+/-</sup> mice.** (A,B) Alcian blue-stained sections through E14.5 (A) and E16.5 (B) distal femurs. Restriction in the width of the growth plate at the junction between the resting and proliferative zones is observed in *Bmpr1a*<sup>CKO</sup> and *Bmpr1a*<sup>CKO</sup>;*1b*<sup>+/-</sup> mice compared with wild-type. (C) H/E-stained sections through columnar zones of E16.5 wild-type, *Bmpr1a*<sup>CKO</sup> and *Bmpr1a*<sup>CKO</sup>;*1b*<sup>+/-</sup> littermates reveal a failure to adopt a flattened cell shape and intercalate in mutants. (D) H/E-stained sections through the hypertrophic zones of E16.5 wild-type, *Bmpr1a*<sup>CKO</sup> and *Bmpr1a*<sup>CKO</sup>;*1b*<sup>+/-</sup> littermates reveal the accumulation in mutants of cells with tightly packed nuclei (arrows), a characteristic feature of late hypertrophic chondrocytes. hyp, hypertrophic zone; ph, prehypertrophic zone; prol, proliferative zone; res, resting zone.

*Bmpr1a*<sup>CKO</sup> and *Bmpr1a*<sup>CKO</sup>;*1b*<sup>+/-</sup> mice by E14.5. At E14.5, the lengths of the growth plates in the distal femur (presumptive joints to centers of cartilage condensations) and the lengths of the hypertrophic zones were smaller in *Bmpr1a*<sup>CKO</sup> and *Bmpr1a*<sup>CKO</sup>;*1b*<sup>+/-</sup> mice than in controls (Fig. 3A). The initially smaller hypertrophic zones in mutants at E14.5 may have arisen because of a smaller pool of cells as a result of the reduced rate of proliferation and the increased incidence of apoptosis.

IHC for ECM markers was performed to examine differentiation in more detail (Fig. 5). At E14.5, collagen II was expressed throughout the growth plates in control and *Bmpr1a*<sup>CKO</sup> mice. Consistent with the smaller hypertrophic zones in mutants at E14.5, the domain of collagen X and osteopontin expression was reduced (Fig. 5A). Although generally characterized as a late hypertrophic marker, osteopontin expression was found throughout the hypertrophic zone in E14.5 wild-type growth plates, in agreement with previous studies (Smits et al., 2004). Osteopontin expression did become restricted to terminal hypertrophic cells at later stages. MMP13 expression was restricted to terminally differentiating hypertrophic chondrocytes in E14.5 control growth plates, and its

domain of expression was significantly reduced in *Bmpr1a*<sup>CKO</sup> mice, suggesting that a smaller number of chondrocytes had reached this stage of development by E14.5.

### BMP signaling is required for terminal differentiation

By E16.5, additional defects in differentiation became apparent in *Bmpr1a*<sup>CKO</sup> and *Bmpr1a*<sup>CKO</sup>;*1b*<sup>+/-</sup> growth plates. Chondrocytes appeared to undergo premature hypertrophy in mutants (Fig. 3B), as evidenced by the shorter distance between the articular surface and the beginning of the hypertrophic zone. In addition, the hypertrophic zones of *Bmpr1a*<sup>CKO</sup> and *Bmpr1a*<sup>CKO</sup>;*1b*<sup>+/-</sup> femurs were expanded at this stage. The expansion observed in *Bmpr1a*<sup>CKO</sup> mice was not exacerbated by the loss of one *Bmpr1b* allele, and is not observed in *Bmpr1b*<sup>-/-</sup> mice (Yi et al., 2000). These results suggest a more prominent role for BMPRIA than for BMP1B in hypertrophic chondrocytes, consistent with the high level of BMPRIA expression in this region. The expansion of the hypertrophic zone could conceivably be caused by a decreased rate of transit through the hypertrophic zone when BMP signaling is decreased, and/or by



impaired apoptosis of terminal hypertrophic chondrocytes. Cells with tightly packed nuclei, a characteristic of terminally differentiated hypertrophic chondrocytes, accumulated in mutant hypertrophic zones (Fig. 3D) (Colnot et al., 2004). This finding suggests that the expanded hypertrophic zone may be a result, at least in part, of a delay in clearance of late hypertrophic chondrocytes through apoptotic mechanisms.

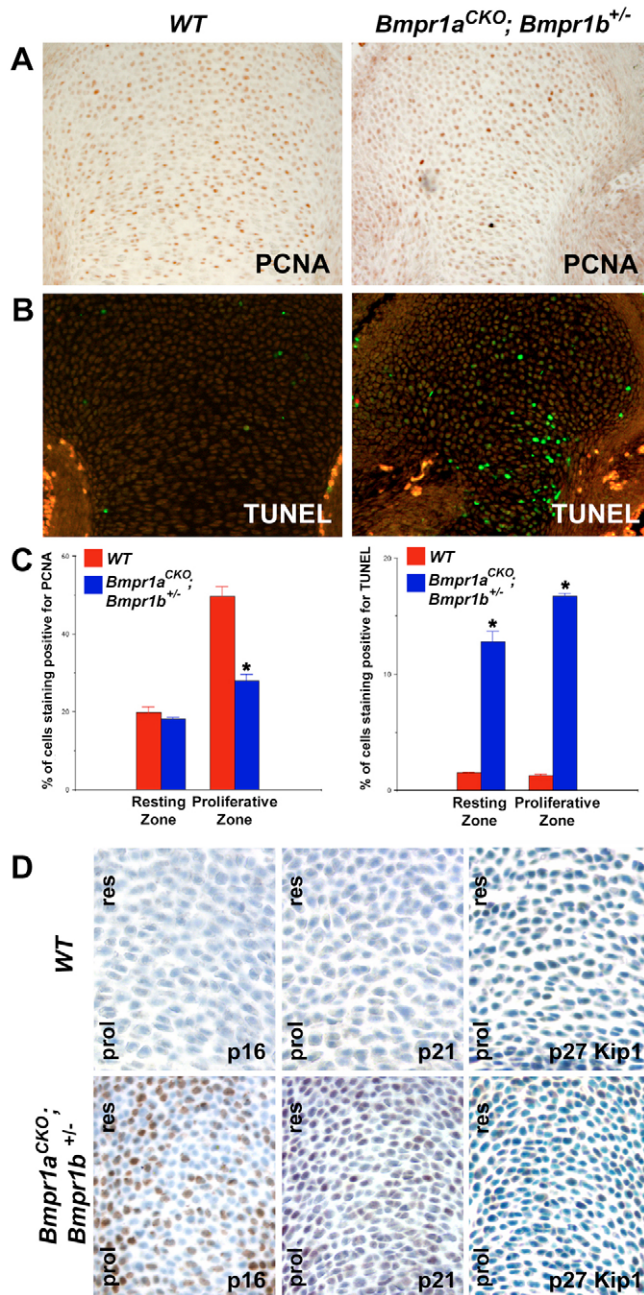

**Fig. 4. Proliferative defects in *Bmpr1a<sup>CKO</sup>;1b<sup>+/-</sup>* mice.** All sections are E16.5 femurs. (A) Immunostaining for PCNA. (B) TUNEL assay reveals abundant apoptotic cells in the resting and columnar zones of mutants. (C) Quantification of the rates of proliferation (PCNA) and apoptosis (TUNEL) in wild-type and mutant littermates. Values are expressed as percent labeled cells. (D) Immunostaining for CKIs reveals increased expression of p16, p21 and p27 in mutant proliferative zones. \* $P < 0.001$ .

IHC analysis revealed an expanded zone of collagen X expression (Fig. 5B). The expression domains of osteopontin and MMP13 were also expanded in *Bmpr1a<sup>CKO</sup>* mice, suggesting that the expansion of the hypertrophic zone is, at least in part, due to an accumulation of terminally differentiated chondrocytes. This possibility is further supported by the finding that the region of the hypertrophic zone occupied by late hypertrophic chondrocytes was proportionately larger in mutants, as shown by a comparison of the zones of COLX and MMP13 expression.

*Bmpr1a<sup>CKO</sup>* growth plates exhibited aberrant angiogenesis in the hypertrophic zone (Fig. 6). In control mice, angiogenesis proceeded evenly across the chondro-osseous junction. However, in mutants, blood vessels invaded the hypertrophic zone, forming a disorganized chondro-osseous junction. This phenotype is possibly a consequence of the expansion in MMP13-expressing chondrocytes in mutants. MMP13 is a potent angiogenic factor that promotes growth-plate angiogenesis (D'Angelo et al., 2000; Johansson et al., 1997; Stickens et al., 2004).

### BMP signaling is an important regulator of IHH signaling

The IHH/PTHrP pathway forms a negative-feedback loop that regulates the onset of hypertrophic differentiation. As in *Bmpr1a<sup>CKO</sup>* and *Bmpr1a<sup>CKO</sup>;1b<sup>+/-</sup>* mice, *Ihh<sup>-/-</sup>* growth plates initially exhibit smaller hypertrophic zones, followed by premature hypertrophic differentiation (St-Jacques et al., 1999). Therefore, we examined IHH/PTHrP pathway components in *Bmpr1a<sup>CKO</sup>* mice (Fig. 7A,B). Decreased expression of *Ihh* was observed in mutants, a finding consistent with the effects of the BMP antagonist NOGGIN in limb-culture studies (Pathi et al., 1999; Minina et al., 2001). Furthermore, *Bmpr1a<sup>CKO</sup>* growth plates had reduced expression of *Ptc1*, the receptor for IHH and a direct target of IHH signaling. No differences were found in expression of *Pthr1*, the receptor for PTHrP.

The existence of functional SMAD-responsive sites on the *Ihh* promoter (Seki and Hata, 2004), and the high levels of pSMAD1, pSMAD5 and pSMAD8 activation at the proliferative-prehypertrophic junction, suggest that IHH is a direct target of SMAD-mediated BMP signaling in the growth plate. Promoter assays using the *Ihh* promoter were performed in RCS chondrocytic cells to test this possibility (Fig. 7C). Exogenous BMP2 treatment and SMAD1 transfection resulted in an increase in promoter activity when a 994 bp *Ihh* promoter fragment was used (Yoshida et al., 2004), demonstrating that IHH is a target of BMP signaling in chondrocytes. The addition of BMP2 and overexpression of *Smad1* also resulted in an increase in promoter activity when the *Ihh* SMAD-responsive element identified by Seki and Hata (Seki and Hata, 2004) was examined. However, the fold induction was considerably less than with the 994 bp fragment, suggesting that additional BMP-responsive sites on the *Ihh* promoter are utilized in chondrocytes.

### Impaired BMP signaling leads to increased activation of FGF signaling pathways

Impaired BMP signaling in *Bmpr1a<sup>CKO</sup>* and *Bmpr1a<sup>CKO</sup>;1b<sup>+/-</sup>* mice leads to phenotypes resembling those observed in mouse models of FGF-induced achondroplasia. These observations prompted us to examine whether effectors of FGF signaling pathways are activated in BMP receptor mutants. At least two signaling pathways mediate FGF signaling in chondrocytes; STATs and ERK1/2 MAPK (Sahni et al., 2001; Murakami et al., 2004). STATs mediate the ability of FGFs to promote apoptosis and CKI expression (Sahni et al., 2001; Aszodi et al., 2003). Activation of ERK1/2 MAPK has been suggested to



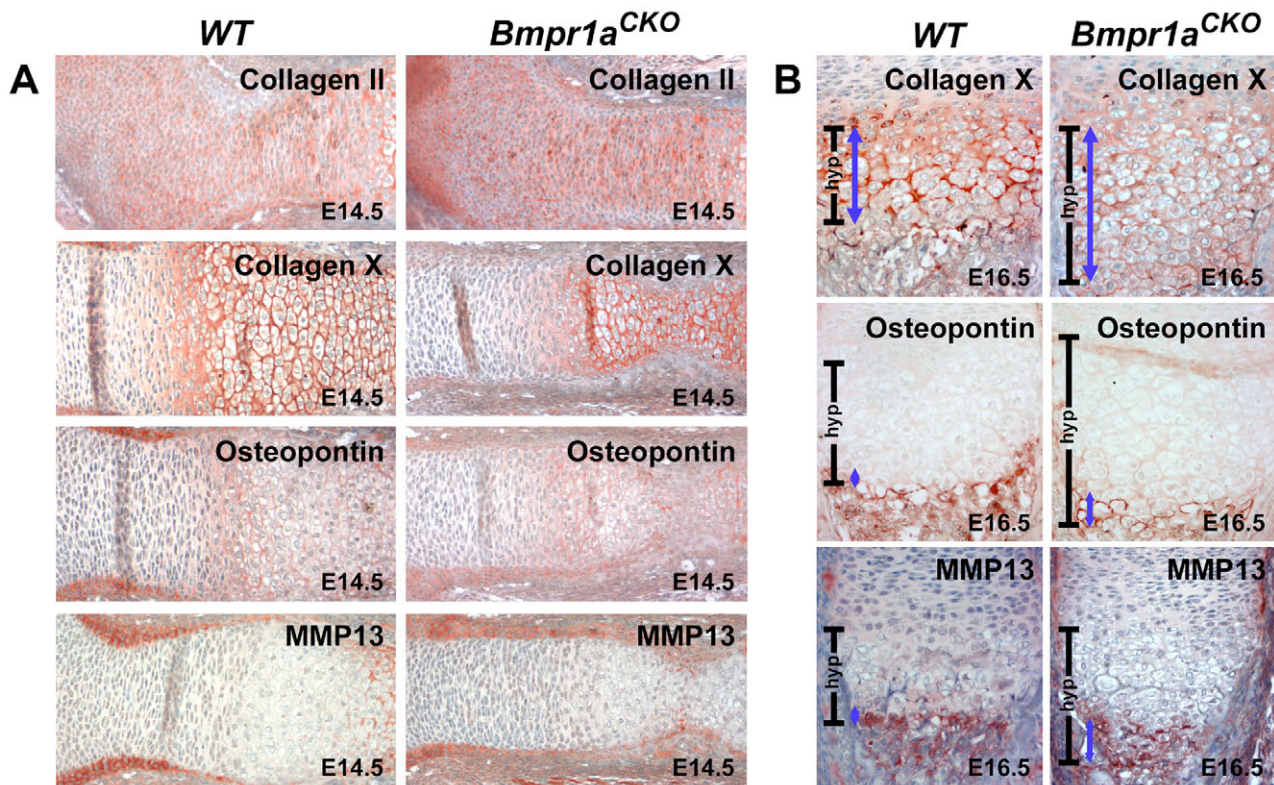

**Fig. 5. Defects in hypertrophic differentiation in *Bmpr1a*<sup>CKO</sup> mice.** (A) E14.5 and (B) E16.5 distal femoral growth plates immunostained for markers of hypertrophic differentiation. In B, the length of the hypertrophic zone is demarcated by a black bar. The region of marker expression is demarcated by blue double-headed arrows. There is an increase in the overall length of the hypertrophic zone and a disproportionately enlarged zone of late hypertrophic chondrocytes in mutants at E16.5.

mediate the ability of FGFs to prevent chondrocyte differentiation (Murakami et al., 2004). In control mice, activated phospho-STAT1 and STAT5a were predominantly localized to the prehypertrophic and hypertrophic zones (Fig. 8A,B, and data not shown). By contrast, there was a significant increase in activated STAT1- and STAT5a-positive chondrocytes in the proliferative zones in *Bmpr1a*<sup>CKO</sup>; *1b*<sup>+/-</sup> mice. Furthermore, a higher percentage of chondrocytes in mutant hypertrophic zones exhibited active STAT signaling.

Although ERK1/2 MAPK is a major mediator of FGF signaling in the growth plate, the localization of endogenous activated ERK1/2 has not been reported previously. In control mice, ERK1/2 MAPK signaling was restricted primarily to postmitotic regions of the growth plate: the periarticular and hypertrophic zones (Fig. 8C). There was a lateral expansion in ERK1/2 MAPK signaling in the periarticular region in *Bmpr1a*<sup>CKO</sup>; *1b*<sup>+/-</sup> mice. No differences in the percentage of cells undergoing ERK1/2 MAPK signaling could be observed between hypertrophic zones of *Bmpr1a*<sup>CKO</sup>; *1b*<sup>+/-</sup> and control mice, but we cannot rule out quantitative differences. These results indicate that at least two functional components of FGF intracellular signaling, STAT and ERK1/2 MAPK, are hyperactivated when BMP signaling is impaired, and that this upregulation occurs in specific regions of the growth plate.

#### FGFR1 levels are increased in *Bmpr1a*<sup>CKO</sup> and *Bmpr1a*<sup>CKO</sup>; *1b*<sup>+/-</sup> growth plates

One mechanism that could account for the activation of multiple mediators of FGF signaling would be the elevated expression of FGF receptors. FGFR1 is expressed most highly in prehypertrophic

and hypertrophic chondrocytes, regions where pSMAD1, pSMAD5, and pSMAD8 levels are also at their highest (Fig. 1) (Peters et al., 1992; Jacob et al., 2006). Therefore, we examined levels of FGFR1 expression (Fig. 9). The domain of expression of FGFR1 was expanded considerably in mutant growth plates at E16.5; in addition to expression in the enlarged hypertrophic zones of *Bmpr1a*<sup>CKO</sup> and *Bmpr1a*<sup>CKO</sup>; *1b*<sup>+/-</sup> mice, FGFR1 expression could now be detected throughout the columnar and epiphyseal regions. This finding suggests that BMP pathways antagonize FGF pathways in part by inhibiting expression of FGF receptors.

## DISCUSSION

### BMPRIA and BMPRIB in the growth plate

BMPRIA and BMPRIB are coexpressed throughout the growth plate, and analysis of *Bmpr1a*<sup>CKO</sup> and *Bmpr1a*<sup>CKO</sup>; *1b*<sup>+/-</sup> mice demonstrates that they have overlapping functions in chondrogenesis. However, BMPRIA and BMPRIB have some unique roles. *Bmpr1a*<sup>CKO</sup> mice develop an expanded hypertrophic zone, a phenotype that is not exacerbated by the loss of one *Bmpr1b* allele and is not observed in *Bmpr1b*<sup>-/-</sup> mice. BMPRIA is highly expressed in the hypertrophic zone, whereas BMPRIB is only weakly expressed there. These findings support the conclusion that BMPRIA plays a more prominent role in the hypertrophic zone than does BMPRIB. Conversely, BMPRIB has a more important role in periarticular cells, a region that will give rise to articular cartilage. BMPRIB is more highly expressed than BMPRIA in this area of the growth plate (Fig. 1). Furthermore, *Bmpr1b*<sup>-/-</sup> mice exhibit joint laxity and develop osteoarthritis (Yi



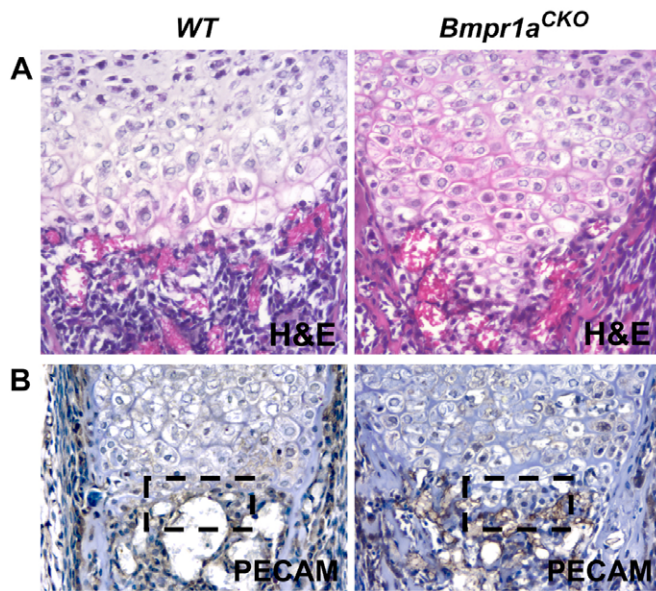

**Fig. 6. Impaired growth-plate angiogenesis in *Bmpr1a*<sup>CKO</sup> mice.** (A) H/E-stained sections from E16.5 distal femurs. (B) Adjacent sections immunostained for PECAM. In wild-type mice, blood vessels are restricted to the chondro-osseous junction (boxed area in B), where apoptotic chondrocytes are located. In *Bmpr1a*<sup>CKO</sup> mutants, blood vessels can be seen invading the region of the growth plate occupied by late hypertrophic chondrocytes.

et al., 2000) (our unpublished data), phenotypes that could potentially arise from defects in the formation of the epiphysis and/or articular cartilage.

Loss of one *Bmpr1a* allele in the *Bmpr1b* null background results in a skeletal phenotype that is indistinguishable from that of *Bmpr1b*<sup>-/-</sup> mice (data not shown), suggesting that one functional *Bmpr1a* allele is sufficient for the formation of the majority of endochondral elements. By contrast, severe chondrodysplasia occurs in *Bmpr1a*<sup>CKO</sup>;*1b*<sup>+/-</sup> mice, in which only one functional *Bmpr1b* allele is present. These results suggest that BMPRIA is more important than BMPRIB in endochondral ossification. It is unclear whether this reflects differences in relative expression levels and/or qualitative differences between BMPRIA and BMPRIB. This will need to be resolved in future studies.

The contribution of the remaining type I receptor, ACTRI, in the growth plate remains to be addressed. Overexpression of CA-ACTRI delays differentiation and inhibits collagen X expression, effects opposite to those observed when growth plates are treated with BMPs. In agreement, CA-ACTRI induces expression of PTHrP, an inhibitor of hypertrophic differentiation (Zhang et al., 2003). These results, although unexpected, correlate with sites of ACTRI expression in the resting and proliferative zones; areas where chondrocytes need to prevent premature differentiation (Zhang et al., 2003). Future genetic studies are necessary to examine whether ACTRI receptors are redundant with BMPRIA and BMPRIB in chondrogenesis.

### BMP signaling regulates multiple aspects of differentiation in the growth plate

Immunostaining for phospho-SMAD1, phospho-SMAD5 and phospho-SMAD8 demonstrates a progressive increase in the percentage of cells responding to BMP signaling as they progress

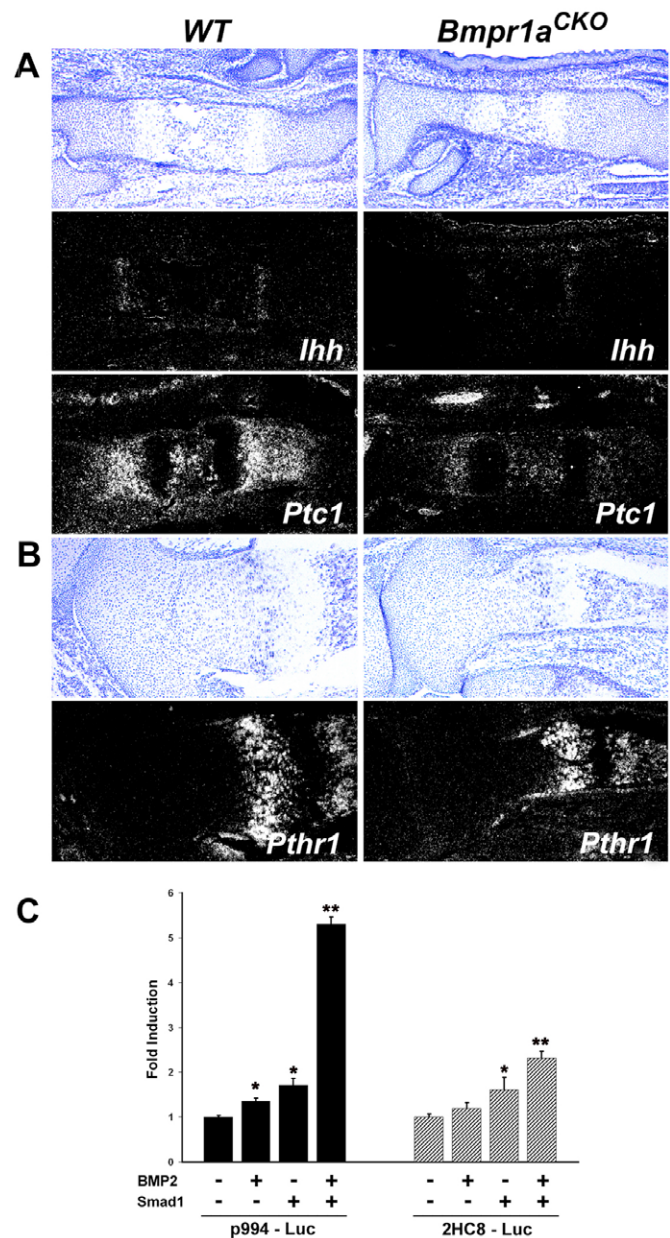

**Fig. 7. Impaired IHH signaling in *Bmpr1a*<sup>CKO</sup> mice.** (A) Expression of *Ihh* and *Ptc1* by in situ hybridization. Expression of *Ihh* and its target, *Ptc*, is reduced in mutants. (B) No differences in expression levels of the PTHrP receptor *Pthr1* are observed in mutants. (C) *Ihh* may be a direct target of BMP pathways in chondrocytes. p994 luc consists of a 994 bp fragment of the mouse *Ihh* promoter (-889/+105) (Yoshida et al., 2004). 2HC8 consists of a 429 bp fragment of the mouse *Ihh* promoter (-423/+1) (Seki and Hata, 2004). These were transiently transfected into RCS chondrocytes in the presence or absence of BMP2 (60 ng/ml) and a SMAD1 expression construct. \**P*<0.05; \*\**P*<0.005.

from the resting to the prehypertrophic zone, raising the strong possibility that BMPs play an important role in regulating the balance between proliferation and differentiation. In agreement, *Bmpr1a*<sup>CKO</sup> and *Bmpr1a*<sup>CKO</sup>;*1b*<sup>+/-</sup> mice develop shortened proliferative zones, probably due, in part, to defects in proliferation and survival. These findings are consistent with and extend previous limb-culture studies showing that exogenously applied BMPs



increase proliferation (Pathi et al., 1999; Minina et al., 2001). We further demonstrate that BMPs regulate proliferation, at least in part, by inhibiting CKIs, such as p16, p21 and p27. Interestingly, at the resting/proliferative junction, where the highest rates of proliferation are normally found (Smits et al., 2004), there is a significant increase

in apoptosis in *Bmpr1a<sup>CKO</sup>;Ib<sup>+/-</sup>* mice, suggesting that BMPs may regulate the decision to proliferate or die. In a recent study, ID3 was identified as an important regulator of this decision in neural-crest precursors (Kee and Bronner-Fraser, 2005). IDs are direct targets of BMP signaling in multiple cell types, and promote proliferation (Kowanetz et al., 2004). Consequently, BMPs, acting through IDs, may have a similar role at the resting/proliferative junction.

Analysis of *Bmpr1a<sup>CKO</sup>* and *Bmpr1a<sup>CKO</sup>;Ib<sup>+/-</sup>* mice suggests that BMPs are important regulators of differentiation because of an essential role in IHH signaling. *Ihh* and its receptor *Ptc1* are downregulated in mutants, consistent with previous work suggesting that BMPs function at least in part through an IHH-dependent pathway (Minina et al., 2001; Zhang et al., 2003). A high percentage of chondrocytes fail to intercalate and form columns in mutant growth plates, and in the more severely affected *Bmpr1a<sup>CKO</sup>;Ib<sup>+/-</sup>* mice, fail to take on the characteristic flattened morphology. Similar features have been noted in *Ihh<sup>-/-</sup>* growth plates (St-Jacques et al., 1999), further strengthening the argument for a functional connection between BMP and IHH signaling.

As shown previously, loss of BMP signaling leads to a delay in the onset of hypertrophic differentiation (Yoon et al., 2005). At E14.5, *Bmpr1a<sup>CKO</sup>;Ib<sup>+/-</sup>* mutant growth plates have reduced hypertrophic zones and have only just begun to express the late hypertrophic marker MMP13. This initial delay may be due to a reduced pool of cells as a result of impaired proliferation and increased apoptosis. This feature is also indicative of decreased signaling output from the PTHrP/IHH feedback loop (St-Jacques et al., 1999).

The relationships between this loop and BMP pathways have not been fully elucidated. Based on BMP-receptor overexpression studies in the chick, it was proposed that BMPs mediate the ability of IHH to induce PTHrP expression (Zou et al., 1997). However, in the mouse, it has been shown that BMPs do not directly upregulate PTHrP (Minina et al., 2001; Kobayashi et al., 2005). Similarly, some studies have suggested that BMP pathways induce *Ihh* expression in chondrocytes (Zhang et al., 2003), whereas other studies do not support this hypothesis (Kobayashi et al., 2005). We show that the *Ihh* promoter is responsive to SMAD1 in chondrocytes, suggesting that BMPs induce *Ihh*, and that this regulation may be direct.

By E16.5, *Bmpr1a<sup>CKO</sup>* and *Bmpr1a<sup>CKO</sup>;Ib<sup>+/-</sup>* mice develop expanded hypertrophic zones. The expanded domains of osteopontin and MMP13 expression, and the accumulation of cells with tightly packed nuclei, a characteristic of late hypertrophic chondrocytes, suggest that the expansion of the hypertrophic zone is due, at least in part, to delayed differentiation and/or failure to complete terminal differentiation. Our conclusions differ somewhat from those found in limb-culture studies following inhibition of BMP pathways by treatment with NOGGIN (Minina et al., 2001). In those studies, exposure to NOGGIN led to an expanded domain of osteopontin expression; in contrast to our results, a reduced rather than an expanded domain of collagen X expression was observed. These results led the researchers to conclude that differentiation is accelerated when BMP signaling is inhibited (Minina et al., 2001). In *Bmpr1a<sup>CKO</sup>* and *Bmpr1a<sup>CKO</sup>;Ib<sup>+/-</sup>* mice, although the length of the hypertrophic zone is expanded, the onset of ossification is delayed rather than accelerated, as would be predicted from the limb-culture models. The expansion of collagen X expression, accumulation of terminal hypertrophic chondrocytes and impaired ossification in *Bmpr1a<sup>CKO</sup>* and *Bmpr1a<sup>CKO</sup>;Ib<sup>+/-</sup>* mice suggest that BMP signaling is required for completion of terminal hypertrophic differentiation. These different outcomes may reflect differences in responses to acute (as in limb-culture studies) versus chronic (as in

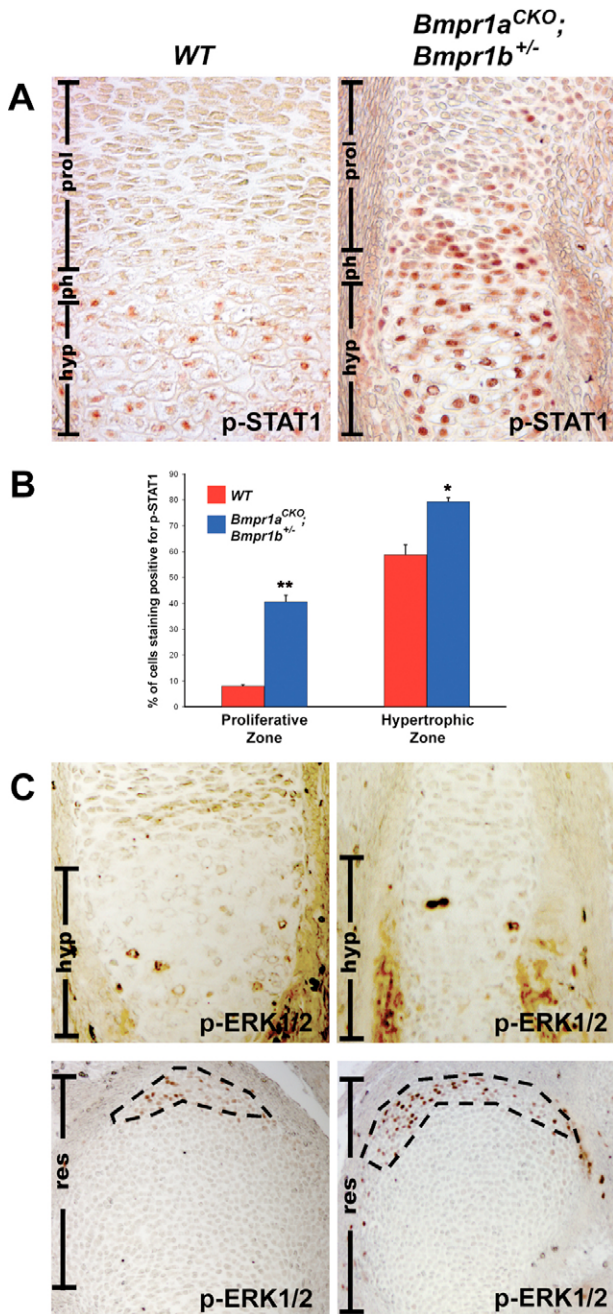

**Fig. 8. Elevated pSTAT and pERK1/2 in *Bmpr1a<sup>CKO</sup>;Ib<sup>+/-</sup>* growth plates.** All sections are E16.5 distal femurs. (A) p-STAT1 immunostaining. (B) Quantification of increased p-STAT1 in mutants, expressed as percent positive cells. (C) p-ERK1/2 immunostaining in the hypertrophic (upper) and periarticular (lower) region. P-ERK1/2 immunostaining can be detected in hypertrophic chondrocytes, but there is no detectable difference in the number of positive cells in this region. An increased percentage of p-ERK1/2-staining cells can be observed in the outlined periarticular (resting) zone in mutants. \* $P < 0.01$ ; \*\* $P < 0.001$ .

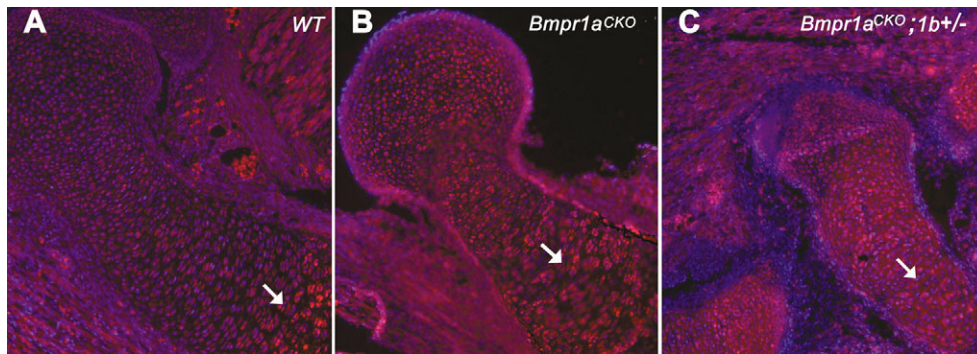

**Fig. 9. Expanded domain of FGFR1 expression in *Bmpr1a*<sup>CKO</sup> and *Bmpr1a*<sup>CKO</sup>;*1b*<sup>+/-</sup> growth plates.** Immunofluorescence staining for FGFR1 in (A) wild-type, (B) *Bmpr1a*<sup>CKO</sup> and (C) *Bmpr1a*<sup>CKO</sup>;*1b*<sup>+/-</sup> distal femurs at E16.5. Intense staining is restricted to the hypertrophic zone (arrow) in wild-type mice. In *Bmpr1a*<sup>CKO</sup> mice, intense staining for FGFR1 persists in the expanded hypertrophic zone (arrow), but is also seen in epiphyseal and columnar chondrocytes. A similar expansion of the domain of FGFR1 expression is observed in *Bmpr1a*<sup>CKO</sup>;*1b*<sup>+/-</sup> growth plates.

our genetic study) loss of BMP signaling, or differences in target tissues (all tissues are exposed to exogenous factors in limb culture whereas our genetic study utilized chondrocyte-specific loss of BMP signaling).

### BMP and FGF signaling antagonize one another

Activating mutations in FGFR3 lead to achondroplasia, the most common cause of dwarfism in humans. Expression of activated FGFR3 in mice leads to phenotypes that resemble those observed in humans (Naski et al., 1998). Growth plates of these mice exhibit both decreased proliferation and expression of *Ihh*, and increased expression of CKIs (Naski et al., 1998; Chen et al., 1999; Sahni et al., 1999), phenotypes recapitulated in *Bmpr1a*<sup>CKO</sup> and *Bmpr1a*<sup>CKO</sup>;*1b*<sup>+/-</sup> mice. Limb-culture studies have shown that BMP and FGF signaling pathways have opposing functions in the growth plate (Minina et al., 2002). However, the mechanism of this antagonism has not been elucidated. Our analysis of *Bmpr1a*<sup>CKO</sup> and *Bmpr1a*<sup>CKO</sup>;*1b*<sup>+/-</sup> mice demonstrates that BMPs antagonize FGF signaling by inhibiting at least two of the intracellular pathways activated by FGFs: STAT and ERK1/2 MAPK. One possible mechanism by which BMPs may inhibit STAT and ERK1/2 is by negatively regulating the expression of FGF signaling components. However, some limb-culture studies suggest that BMPs promote the expression of FGF signaling components in the growth plate, rather than inhibiting them. Future studies are needed to clarify the mechanisms by which BMPs inhibit FGF signaling, but our studies suggest that BMPs inhibit FGF pathways at least in part by limiting the domain of expression of FGFR1. Given the essential roles for FGFR3 and FGF18 in chondrogenesis (reviewed in Ornitz, 2005), examination of the expression levels of these signaling components will be of great interest in future studies.

Interesting, loss of *Fgfr1* in chondrocytes leads to a delay in terminal maturation (Jacob et al., 2006). This finding is seemingly at odds with our hypothesis that BMP and FGF pathways exert opposing functions in the growth plate, as loss of BMP signaling also leads to a delay in terminal maturation. There are several possible explanations for this apparent discrepancy. First, it is conceivable that BMP and FGF pathways have opposing roles in some aspects of chondrogenesis, but additive or synergistic roles in others. Thus FGF and BMP pathways may collaborate to promote aspects of hypertrophic chondrocyte maturation. Second, FGFR1 and FGFR3 exhibit some overlapping expression, and both receptors can transduce similar signals (reviewed in Ornitz, 2005). Thus, it

is possible that functional redundancy and/or compensatory upregulation of other FGF receptors occurs in *Fgfr1*<sup>CKO</sup> mice. Third, the delays in maturation observed in *Fgfr1*<sup>CKO</sup> and *Bmpr* mutant mice may occur through distinct mechanisms. In support of this latter proposal, expression of OPN, MMP9 and MMP13 is reduced or unaltered in *Fgfr1*<sup>CKO</sup> mice, whereas the domains of expression of these markers are increased in *Bmpr* mutants (Fig. 8, data not shown). Clearly, additional *in vivo* studies are needed to clarify the nature of the interactions between BMP and FGF signaling pathways in distinct regions of the growth plate.

Our analysis of *Bmpr1a*<sup>CKO</sup> and *Bmpr1a*<sup>CKO</sup>;*1b*<sup>+/-</sup> mice also demonstrates that BMP signaling partially inhibits ERK1/2 MAPK. Although the increased levels of FGFR1 expression suggest that ERK1/2 levels may be elevated in *Bmpr1a*<sup>CKO</sup> and *Bmpr1a*<sup>CKO</sup>;*1b*<sup>+/-</sup> mice because of activation of FGF pathways, it is possible that additional pathways that transduce their signals through ERK1/2 are perturbed in mutants. In wild-type growth plates, ERK1/2 MAPK is activated in periarticular, prehypertrophic and hypertrophic chondrocytes. The localization of active signaling in the prehypertrophic and hypertrophic zones is consistent with the role that has been ascribed to ERK1/2 MAPK signaling in chondrocyte differentiation (Murakami et al., 2004). There is no detectable difference in the level of ERK1/2 MAPK signaling in the prehypertrophic and hypertrophic zones of *Bmpr1a*<sup>CKO</sup> and *Bmpr1a*<sup>CKO</sup>;*1b*<sup>+/-</sup> mice. However, we cannot rule out the possibility that the overall level of ERK1/2 MAPK activation is altered in prehypertrophic and/or hypertrophic chondrocytes in mutants, as IHC more readily reveals spatial rather than quantitative changes. The percentage of cells engaged in ERK1/2 MAPK signaling is increased in the periarticular regions of mutant growth plates. The role of ERK1/2 MAPK in periarticular cells has not been fully described. However, ERK1/2 MAPK may have an important role in promoting articular cartilage and/or joint formation (Bastow et al., 2005); our studies thus suggest that the ability of excess BMP signaling to lead to joint fusions (e.g. Brunet et al., 1998) may in part be a consequence of inhibition of ERK1/2 activity.

It is likely that multiple signal transduction pathways, both downstream and independent of FGF signaling, are altered upon loss of BMP signaling in the growth plate. FGFs transduce their effects on chondrocytes through Rb proteins, p38, PLCγ and AKT, in addition to STAT and ERK1/2 (Cobrinik et al., 1996; Laplantine et al., 2002; Krejci et al., 2004; Raucci et al., 2004; Sugimori et al., 2005; Priore et al., 2006; Zhang et al., 2006). Further studies will be



required to determine the extent to which alterations in each of these pathways contribute to the phenotypes observed when BMP signaling is decreased.

Taken together, our studies reveal that BMP pathways are essential for multiple aspects of chondrogenesis, and that BMPs regulate IHH levels at least in part via canonical SMAD pathways. To what extent do BMPs utilize canonical (SMAD-mediated) versus non-canonical pathways in cartilage remains an important unanswered question. Current models suggest that SMAD4 is required for transduction of canonical signals via BMP SMAD1, SMAD5 and SMAD8 (ten Dijke et al., 2003; Massagué and Gomis, 2006). Given the severity of the phenotypes seen in mice lacking *Bmpr1a* and *Bmpr1b* in cartilage (Yoon et al., 2005) (see also the results described here), it is thus surprising that mice lacking *Smad4* in cartilage exhibit fairly normal skeletal development, prior to developing postnatal chondrodysplasia (Zhang et al., 2005). This disparity may reflect a more important role for non-canonical than canonical pathways in cartilage. Alternatively, several recent studies suggest that not all SMAD-mediated responses to TGF $\beta$  require SMAD4 (Ijichi et al., 2004; He et al., 2006; Liu et al., 2006). Analyses of the role of the *Drosophila* SMAD4 homolog Medea indicate that BMP SMADs can also function independently of SMAD4 (Wisotzkey et al., 1998). Analyses of mice lacking BMP SMADs in cartilage will thus be required to resolve whether the different phenotypes of mice lacking SMAD4 and those lacking BMP receptors reflect roles for non-canonical pathways, or canonical pathways independent of SMAD4.

## References

- Aszodi, A., Hunziker, E. B., Brakebusch, C. and Fassler, R. (2003). Beta1 integrins regulate chondrocyte rotation, G1 progression, and cytokinesis. *Genes Dev.* **17**, 2465-2479.
- Bastow, E. R., Lamb, K. J., Lewthwaite, J. C., Osborne, A. C., Kavanagh, E., Wheeler-Jones, C. P. and Pitsillides, A. A. (2005). Selective activation of the MEK-ERK pathway is regulated by mechanical stimuli in forming joints and promotes pericellular matrix formation. *J. Biol. Chem.* **280**, 11749-11758.
- Baur, S. T., Mai, J. J. and Dymecki, S. M. (2000). Combinatorial signaling through BMP receptor IB and GDF5: shaping of the distal mouse limb and the genetics of distal limb diversity. *Development* **127**, 605-619.
- Beier, F., Leask, T. A., Haque, S., Chow, C., Taylor, A. C., Lee, R. J., Pestell, R. G., Ballock, R. T. and LuValle, P. (1999). Cell cycle genes in chondrocyte proliferation and differentiation. *Matrix Biol.* **18**, 109-120.
- Brunet, L. J., McMahon, J. A., McMahon, A. P. and Harland, R. M. (1998). Noggin, cartilage morphogenesis, and joint formation. *Science* **280**, 1455-1457.
- Chen, L., Adar, R., Yang, X., Monson, E. O., Li, C., Hauschka, P. V., Yayon, A. and Deng, C. X. (1999). Gly369Cys mutation in mouse FGFR3 causes achondroplasia by affecting both chondrogenesis and osteogenesis. *J. Clin. Invest.* **104**, 1517-1525.
- Chung, U. I., Schipani, E., McMahon, A. P. and Kronenberg, H. M. (2001). Indian hedgehog couples chondrogenesis to osteogenesis in endochondral bone development. *J. Clin. Invest.* **107**, 295-304.
- Cobrinik, D., Lee, M. H., Hannon, G., Mulligan, G., Bronson, R. T., Dyson, N., Harlow, E., Beach, D., Weinberg, R. A. and Jacks, T. (1996). Shared role of the pRB-related p130 and p107 proteins in limb development. *Genes Dev.* **10**, 1633-1644.
- Colnot, C., Lu, C., Hu, D. and Helms, J. A. (2004). Distinguishing the contributions of the perichondrium, cartilage, and vascular endothelium to skeletal development. *Dev. Biol.* **269**, 55-69.
- Colnot, C., de la Fuente, L., Huang, S., Hu, D., Lu, C., St-Jacques, B. and Helms, J. A. (2005). Indian hedgehog synchronizes skeletal angiogenesis and perichondrial maturation with cartilage development. *Development* **132**, 1057-1067.
- D'Angelo, M., Yan, Z., Nooreyazdan, M., Pacifici, M., Sarmant, D. S., Billings, P. C. and Leboy, P. S. (2000). MMP-13 is induced during chondrocyte hypertrophy. *J. Cell. Biochem.* **77**, 678-693.
- De Luca, F., Barnes, K. M., Uyeda, J. A., De-Levi, S., Abad, V., Palese, T., Mericq, V. and Baron, J. (2001). Regulation of growth plate chondrogenesis by bone morphogenetic protein-2. *Endocrinology* **142**, 430-436.
- He, W., Dorn, D. C., Erdjument-Bromage, H., Tempst, P., Moore, M. A. S. and Massagué, J. (2006). Hematopoiesis controlled by distinct TIF1 gamma and Smad4 branches of the TGF beta pathway. *Cell* **125**, 929-941.
- Horiki, M., Imamura, T., Okamoto, M., Hayashi, M., Murai, J., Myoui, A., Ochi, T., Miyazono, K., Yoshikawa, H. and Tsumaki, N. (2004). Smad6/Smurf1 overexpression in cartilage delays chondrocyte hypertrophy and causes dwarfism with osteopenia. *J. Cell Biol.* **165**, 433-445.
- Ijichi, H., Otsuka, M., Tateishi, K., Ikenoue, T., Kawakami, T., Kanai, F., Arakawa, Y., Seki, N., Shimizu, K., Miyazono, K. et al. (2004). Smad4-independent regulation of p21/WAF1 by transforming growth factor-beta. *Oncogene* **23**, 1043-1051.
- Ivkovic, S., Yoon, B. S., Popoff, S. N., Safadi, F. F., Libuda, D. E., Stephenson, R. C., Daluiski, A. and Lyons, K. M. (2003). Connective tissue growth factor coordinates chondrogenesis and angiogenesis during skeletal development. *Development* **130**, 2979-2991.
- Jacob, A. L., Smith, C., Partanen, J. and Ornitz, D. M. (2006). Fibroblast growth factor receptor 1 signaling in the osteo-chondrogenic cell lineage regulates sequential steps of osteoblast maturation. *Dev. Biol.* **296**, 315-328.
- Jamin, S. P., Arango, N. A., Mishina, Y., Hanks, M. C. and Behringer, R. R. (2002). Requirement of *Bmpr1a* for Mullerian duct regression during male sexual development. *Nat. Genet.* **32**, 408-410.
- Johansson, N., Saarialho-Kere, U., Airola, K., Herva, R., Nissinen, L., Westermarck, J., Vuorio, E., Heino, J. and Kahari, V. M. (1997). Collagenase-3 (MMP-13) is expressed by hypertrophic chondrocytes, periosteal cells, and osteoblasts during human fetal bone development. *Dev. Dyn.* **208**, 387-397.
- Karp, S. J., Schipani, E., St-Jacques, B., Hunzelman, J., Kronenberg, H. and McMahon, A. P. (2000). Indian hedgehog coordinates endochondral bone growth and morphogenesis via parathyroid hormone related-protein-dependent and -independent pathways. *Development* **127**, 543-548.
- Kawashima-Ohya, Y., Satake, H., Kuruta, Y., Kawamoto, T., Yan, W., Akagawa, Y., Hayakawa, T., Noshiro, M., Okada, Y., Nakamura, S. et al. (1998). Effects of parathyroid hormone (PTH) and PTH-related peptide on expressions of matrix metalloproteinase-2, -3, and -9 in growth plate chondrocyte cultures. *Endocrinology* **139**, 2120-2127.
- Kee, Y. and Bronner-Fraser, M. (2005). To proliferate or to die: role of Id3 in cell cycle progression and survival of neural crest progenitors. *Genes Dev.* **19**, 744-755.
- Kobayashi, T., Lyons, K. M., McMahon, A. P. and Kronenberg, H. M. (2005). BMP signaling stimulates cellular differentiation at multiple steps during cartilage development. *Proc. Natl. Acad. Sci. USA* **102**, 18023-18027.
- Kowanz, M., Valcourt, U., Bergstrom, R., Heldin, C. H. and Moustakas, A. (2004). Id2 and Id3 define the potency of cell proliferation and differentiation responses to transforming growth factor beta and bone morphogenetic protein. *Mol. Cell. Biol.* **24**, 4241-4254.
- Krejci, P., Bryja, V., Pachernik, J., Hampl, A., Pogue, R., Mekikian, P. and Wilcox, W. R. (2004). FGF2 inhibits proliferation and alters the cartilage-like phenotype of RCS cells. *Exp. Cell Res.* **297**, 1521-1564.
- Kronenberg, H. M. (2003). Developmental regulation of the growth plate. *Nature* **423**, 332-336.
- Lanske, B., Amling, M., Neff, L., Guiducci, J., Baron, R. and Kronenberg, H. M. (1999). Ablation of the PTHrP gene or the PTH/PTHrP receptor gene leads to distinct abnormalities in bone development. *J. Clin. Invest.* **104**, 399-407.
- Laplantine, E., Rossi, F., Sahni, M., Basilico, C. and Cobrinik, D. (2002). FGF signaling targets the pRB-related p107 and p130 proteins to induce chondrocyte growth arrest. *J. Cell Biol.* **158**, 741-750.
- Liu, G., Ding, W., Neiman, J. and Mulder, K. M. (2006). Requirement of Smad3 and CREB-1 in mediating TGF $\beta$  induction of TGF $\beta$ 3 secretion. *J. Biol. Chem.* **281**, 29479-29490.
- Long, F., Zhang, X. M., Karp, S., Yang, Y. and McMahon, A. P. (2001). Genetic manipulation of hedgehog signaling in the endochondral skeleton reveals a direct role in the regulation of chondrocyte proliferation. *Development* **128**, 5099-5108.
- Long, F., Chung, U. I., Ohba, S., McMahon, J., Kronenberg, H. M. and McMahon, A. P. (2004). Ihh signaling is directly required for the osteoblast lineage in the endochondral skeleton. *Development* **131**, 1309-1318.
- Luna, L. G. (1992). *Histopathologic Methods and Color Atlas of Special Stains and Tissue Artifacts*. Gaithersburg: American Histolabs.
- Macías-Silva, M., Hoodless, P. A., Tang, S. J., Buchwald, M. and Wrana, J. L. (1998). Specific activation of Smad1 signaling pathways by the BMP7 type I receptor, ALK2. *J. Biol. Chem.* **273**, 25628-25636.
- Massagué, J. and Gomis, R. R. (2006). The logic of TGF $\beta$  signaling. *FEBS Lett.* **580**, 2811-2820.
- Minina, E., Wenzel, H. M., Kreschel, C., Karp, S., Gaffield, W., McMahon, A. P. and Vortkamp, A. (2001). BMP and Ihh/PTHrP signaling interact to coordinate chondrocyte proliferation and differentiation. *Development* **128**, 4523-4534.
- Minina, E., Kreschel, C., Naski, M. C., Ornitz, D. M. and Vortkamp, A. (2002). Interaction of FGF, Ihh/PTHrP, and BMP signaling integrates chondrocyte proliferation and hypertrophic differentiation. *Dev. Cell* **3**, 439-449.
- Mishina, Y., Hanks, M. C., Miura, S., Tallquist, M. D. and Behringer, R. R. (2002). Generation of *Bmpr1a*/Alk3 conditional knockout mice. *Genesis* **32**, 69-72.
- Moustakas, A. and Heldin, C. H. (2005). Non-Smad TGF-beta signals. *J. Cell Sci.* **118**, 3573-3584.

- Mukhopadhyay, K., Lefebvre, V., Garofalo, S., Kimura, J. H. and de Crombrughe, B. (1995). Use of a new rat chondrosarcoma cell line to delineate a 199-base pair chondrocyte-specific enhancer element and to define active promoter segments in the mouse pro- $\alpha 1(\text{II})$  collagen gene. *J. Biol. Chem.* **270**, 27711-27719.
- Murakami, S., Balmes, G., McKinney, S., Zhang, Z., Givol, D. and de Crombrughe, B. (2004). Constitutive activation of MEK1 in chondrocytes causes Stat1-independent achondroplasia-like dwarfism and rescues the Fgfr3-deficient mouse phenotype. *Genes Dev.* **18**, 290-305.
- Naski, M. C., Colvin, J. S., Coffin, J. D. and Ornitz, D. M. (1998). Repression of hedgehog signaling and BMP4 expression in growth plate cartilage by fibroblast growth factor receptor 3. *Development* **125**, 4977-4988.
- Olsen, B. R., Reginato, A. M. and Wang, W. (2000). Bone development. *Annu. Rev. Cell Dev. Biol.* **16**, 191-220.
- Ornitz, D. M. (2005). FGF signaling in the developing endochondral skeleton. *Cytokine Growth Factor Rev.* **16**, 205-213.
- Ovchinnikov, D. A., Deng, J. M., Ogunrinu, G. and Behringer, R. R. (2000). Col2a1-directed expression of Cre recombinase in differentiating chondrocytes in transgenic mice. *Genesis* **26**, 145-146.
- Pathi, S., Rutenburg, J. B., Johnson, R. L. and Vortkamp, A. (1999). Interaction of Ihh and BMP/Noggin signaling during cartilage differentiation. *Dev. Biol.* **209**, 239-253.
- Pera, E. M., Ikeda, A., Eivers, E. and De Robertis, E. M. (2003). Integration of IGF, FGF, and anti-BMP signals via Smad1 phosphorylation in neural induction. *Genes Dev.* **17**, 3023-3028.
- Peters, K. G., Werner, S., Chen, G. and Williams, L. T. (1992). Two FGF receptor genes are differentially expressed in epithelial and mesenchymal tissues during limb formation and organogenesis in the mouse. *Development* **114**, 233-243.
- Pizette, S. and Niswander, L. (2000). BMPs are required at two steps of limb chondrogenesis: formation of prechondrogenic condensations and their differentiation into chondrocytes. *Dev. Biol.* **219**, 237-249.
- Priore, R., Dailey, L. and Basilico, C. (2006). Downregulation of Akt activity contributes to the growth arrest induced by FGF in chondrocytes. *J. Cell. Physiol.* **207**, 800-808.
- Pritchett, J. W. (1992). Longitudinal growth and growth plate activity in the lower extremity. *Clin. Orthop. Relat. Res.* **275**, 274-279.
- Qiao, B., Padilla, S. R. and Benya, P. D. (2005). Transforming growth factor (TGF)- $\beta$ -activated kinase 1 mimics and mediates TGF- $\beta$ -induced stimulation of type II collagen synthesis in chondrocytes independent of Col2a1 transcription and Smad3 signaling. *J. Biol. Chem.* **280**, 17562-17571.
- Raucci, A., Laplantine, R., Manuskhani, A. and Basilico, C. (2004). Activation of the ERK1/2 and p38 mitogen-activated protein kinase pathways mediates fibroblast growth factor-induced growth arrest of chondrocytes. *J. Biol. Chem.* **279**, 1747-1756.
- Rosenzweig, B. L., Imamura, T., Okadome, T., Cox, G. N., Yamashita, H., ten Dijke, P., Heldin, C. H. and Miyazono, K. (1995). Cloning and characterization of a human type II receptor for bone morphogenetic proteins. *Proc. Natl. Acad. Sci. USA* **92**, 7632-7636.
- Sahni, M., Ambrosetti, D. C., Mansukhani, A., Gertner, R., Levy, D. and Basilico, C. (1999). FGF signaling inhibits chondrocyte proliferation and regulates bone development through the STAT-1 pathway. *Genes Dev.* **13**, 1361-1366.
- Sahni, M., Raz, R., Coffin, J. D., Levy, D. and Basilico, C. (2001). STAT1 mediates the increased apoptosis and reduced chondrocyte proliferation in mice overexpressing FGF2. *Development* **128**, 2119-2129.
- Seki, K. and Hata, A. (2004). Indian hedgehog gene is a target of the bone morphogenetic protein signaling pathway. *J. Biol. Chem.* **279**, 18544-18549.
- Settle, S. H., Jr, Rountree, R. B., Sinha, A., Thacker, A., Higgins, K. and Kingsley, D. M. (2003). Multiple joint and skeletal patterning defects caused by single and double mutations in the mouse *Gdf6* and *Gdf5* genes. *Dev. Biol.* **254**, 116-130.
- Smits, P., Dy, P., Mitra, S. and Lefebvre, V. (2004). Sox5 and Sox6 are needed to develop and maintain source, columnar, and hypertrophic chondrocytes in the cartilage growth plate. *J. Cell Biol.* **164**, 747-758.
- St-Jacques, B., Hammerschmidt, M. and McMahon, A. P. (1999). Indian hedgehog signaling regulates proliferation and differentiation of chondrocytes and is essential for bone formation. *Genes Dev.* **13**, 2072-2086.
- Stickens, D., Behonick, D. J., Ortega, N., Heyer, B., Hartenstein, B., Yu, Y., Fosang, A. J., Schorpp-Kistner, M., Angel, P. and Werb, Z. (2004). Altered endochondral bone development in matrix metalloproteinase 13-deficient mice. *Development* **131**, 5883-5895.
- Storm, E. E., Huynh, T. V., Copeland, N. G., Jenkins, N. A., Kingsley, D. M. and Lee, S. J. (1994). Limb alterations in brachypodism mice due to mutations in a new member of the TGF  $\beta$ -superfamily. *Nature* **368**, 639-643.
- Sugimori, K., Matsui, K., Motomura, H., Tokoro, T., Wang, J., Higa, S., Kimura, T. and Kitajima, I. (2005). BMP-2 prevents apoptosis of the N1511 chondrocytic cell line through PI3K/Akt-mediated NF- $\kappa$ B activation. *J. Bone Miner. Metab.* **23**, 411-419.
- ten Dijke, P., Yamashita, H., Sampath, T. K., Reddi, A. H., Estevez, M., Riddle, D. L., Ichijo, H., Heldin, C. H. and Miyazono, K. (1994). Identification of type I receptors for osteogenic protein-1 and bone morphogenetic protein-4. *J. Biol. Chem.* **269**, 16985-16988.
- ten Dijke, P., Korchynski, O., Valdimarsdottir, G. and Goumans, M. J. (2003). Controlling cell fate by bone morphogenetic protein receptors. *Mol. Cell. Endocrinol.* **211**, 105-113.
- Tsumaki, N., Nakase, T., Miyaji, T., Kakiuchi, M., Kimura, T., Ochi, T. and Yoshikawa, H. (2002). Bone morphogenetic protein signals are required for cartilage formation and differently regulate joint development during skeletogenesis. *J. Bone Miner. Res.* **17**, 898-906.
- Wilsman, N. J., Farnum, C. E., Green, E. M., Liefnerman, E. M. and Clayton, M. K. (1996a). Cell cycle analysis of proliferative zone chondrocytes in growth plates elongating at different rates. *J. Orthop. Res.* **14**, 562-572.
- Wilsman, N. J., Farnum, C. E., Liefnerman, E. M., Fry, M. and Barreto, C. (1996b). Differential growth by growth plates as a function to multiple parameters of chondrocytic kinetics. *J. Orthop. Res.* **14**, 927-936.
- Wisotzkey, R. G., Mehra, A., Sutherland, D. J., Dobens, L. L., Liu, X., Dohrmann, C., Attisano, L. and Raftery, L. A. (1998). Medea is a *Drosophila* Smad4 homolog that is differentially required to potentiate DPP responses. *Development* **125**, 1433-1445.
- Yi, S. E., Daluiski, A., Pederson, R., Rosen, V. and Lyons, K. M. (2000). The type I BMP receptor BMPRII is required for chondrogenesis in the mouse limb. *Development* **127**, 621-630.
- Yoon, B. S., Ovchinnikov, D. A., Yoshii, I., Mishina, Y., Behringer, R. R. and Lyons, K. M. (2005). *Bmpr1a* and *Bmpr1b* have overlapping functions and are essential for chondrogenesis in vivo. *Proc. Natl. Acad. Sci. USA* **102**, 5062-5067.
- Yoshida, C. A., Yamamoto, H., Fujita, T., Furuichi, T., Ito, K., Inoue, K., Yamana, K., Zamma, K., Takada, I., Ito, Y. et al. (2004). Runx2 and Runx3 are essential for chondrocyte maturation, and Runx2 regulates limb growth through induction of Indian hedgehog. *Genes Dev.* **18**, 952-963.
- Zhang, D., Schwarz, E. M., Rosier, R. N., Zuscik, M. J., Puzas, J. E. and O'Keefe, R. J. (2003). ALK2 functions as a BMP type I receptor and induces Indian hedgehog in chondrocytes during skeletal development. *J. Bone Miner. Res.* **18**, 1593-1604.
- Zhang, J., Tan, S., Li, W., Wang, Y., Wang, J., Cheng, X. and Yang, X. (2005). Smad4 is required for the normal organization of the cartilage growth plate. *Dev. Biol.* **284**, 311-322.
- Zhang, R., Murakami, S., Coustry, F., Wang, Y. and de Crombrughe, B. (2006). Constitutive activation of MKK6 in chondrocytes of transgenic mice inhibits proliferation and delays endochondral bone formation. *Proc. Natl. Acad. Sci. USA* **103**, 365-370.
- Zou, H., Wieser, R., Massagué, J. and Niswander, L. (1997). Distinct roles of type I bone morphogenetic protein receptors in the formation and differentiation of cartilage. *Genes Dev.* **11**, 2191-2203.
